# Supplementary material for: Rapid Depletions of Subcutaneous Fat Mass and Skeletal Muscle Mass Predict Worse Survival in Patients with Hepatocellular Carcinoma Treated with Sorafenib
Source: PubMed Central journal article supplement (PMC6721466; doi:10.3390/cancers11081206), 2019-08-19
Supplement: cancers-11-01206-s001.pdf [file cancers-11-01206-s001.pdf]

**Figure S1.** Kaplan-Meier curves for overall survival time for male.

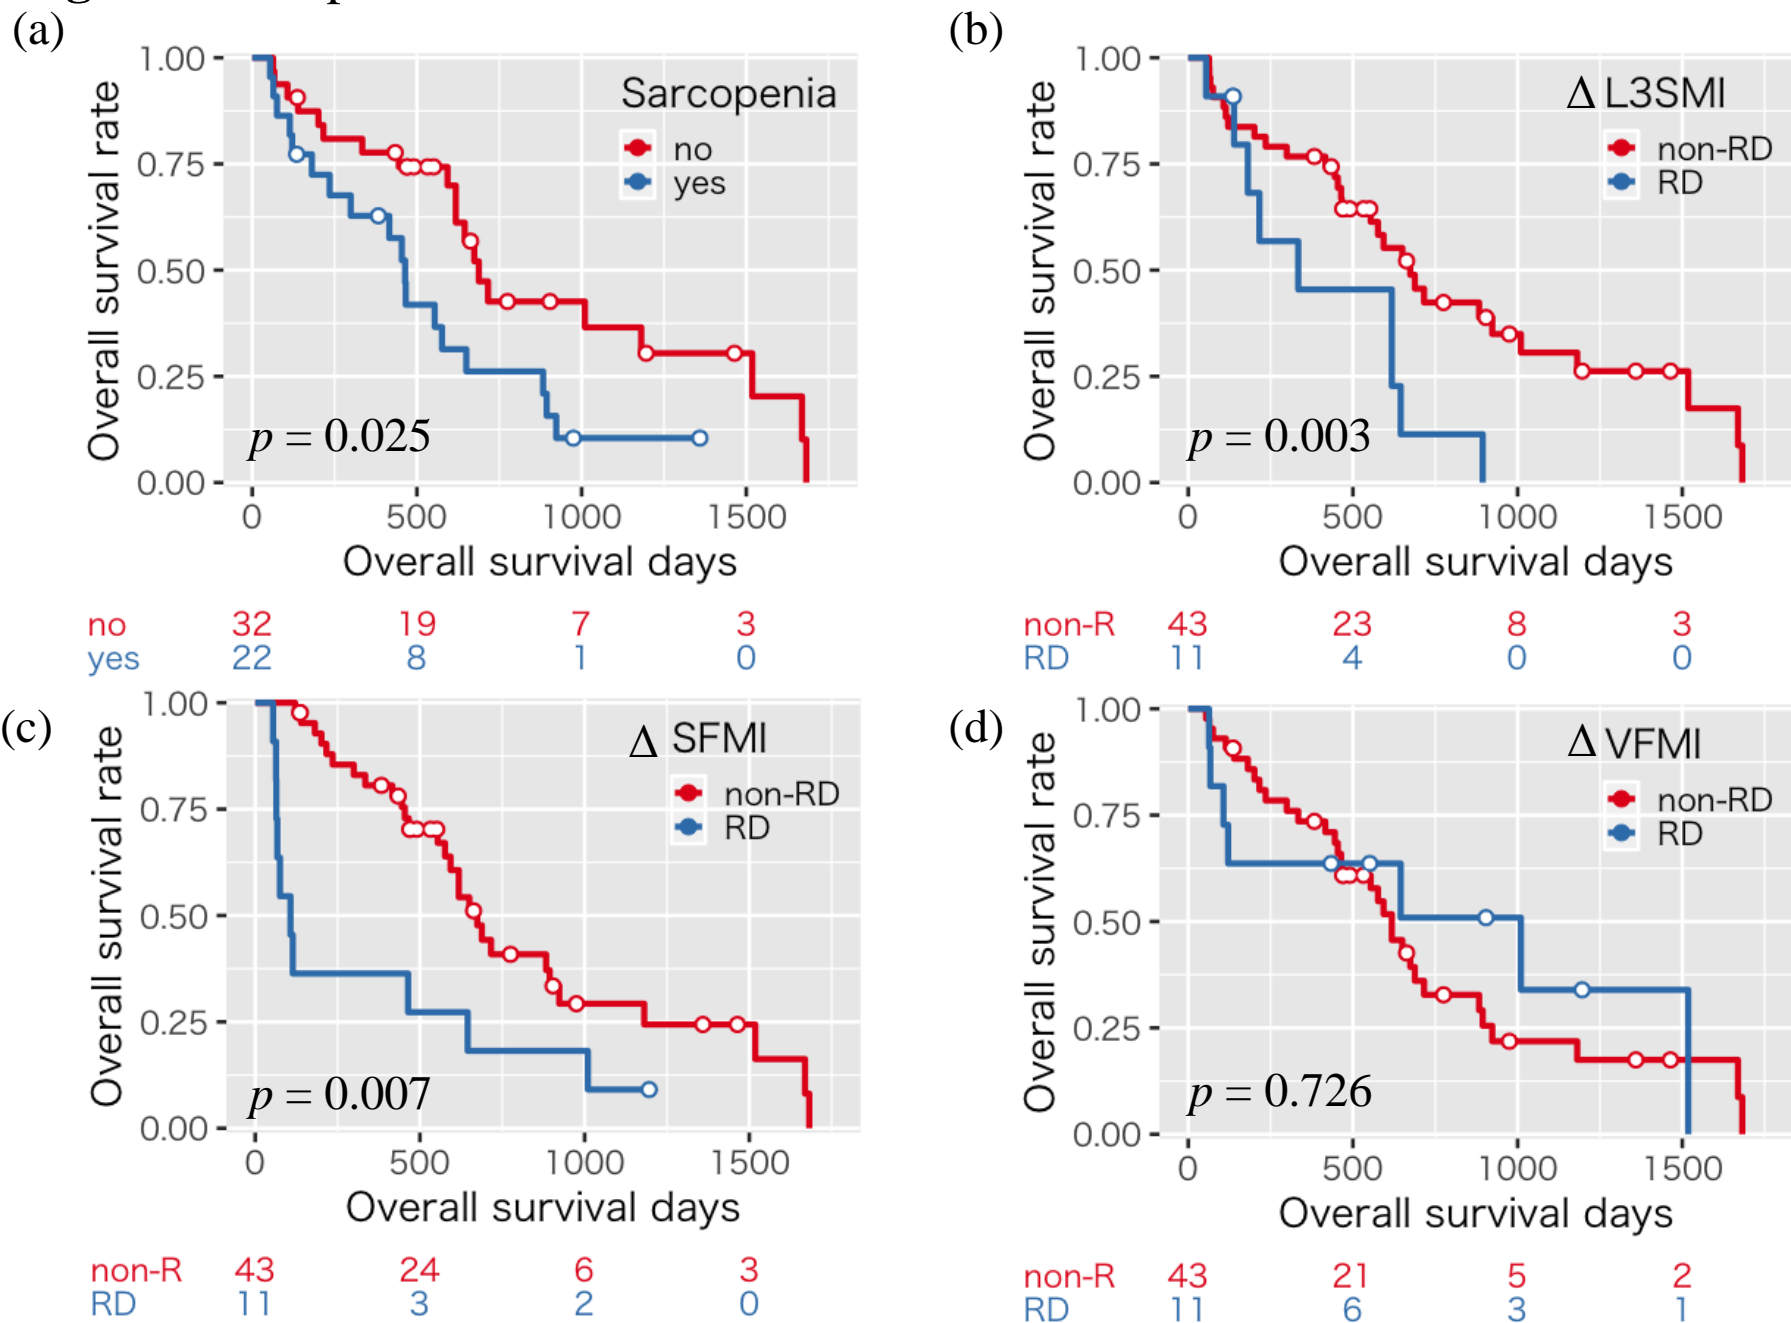

**Figure S2.** Kaplan-Meier curves for overall survival time for female.

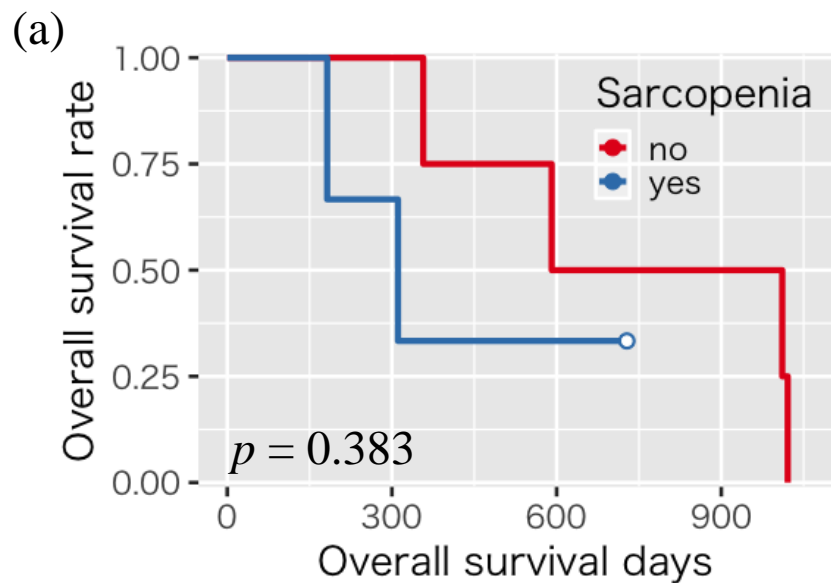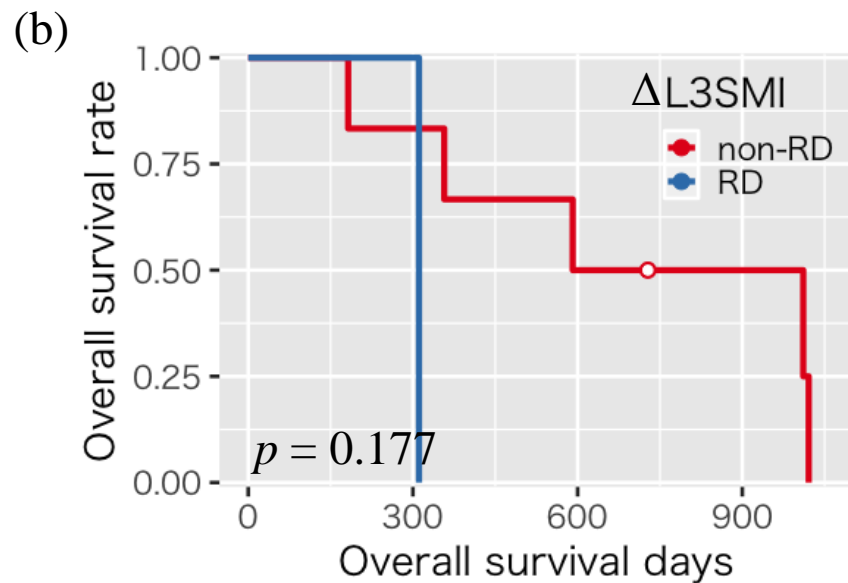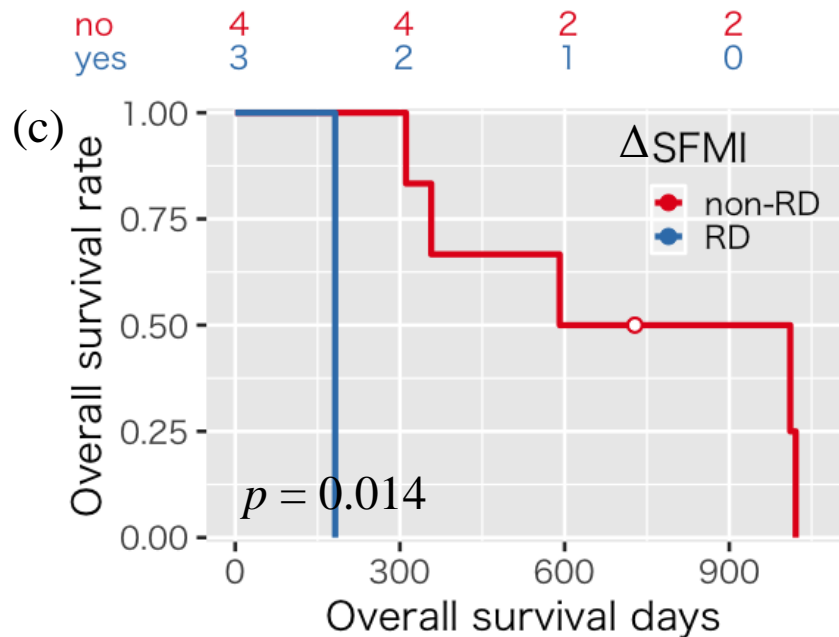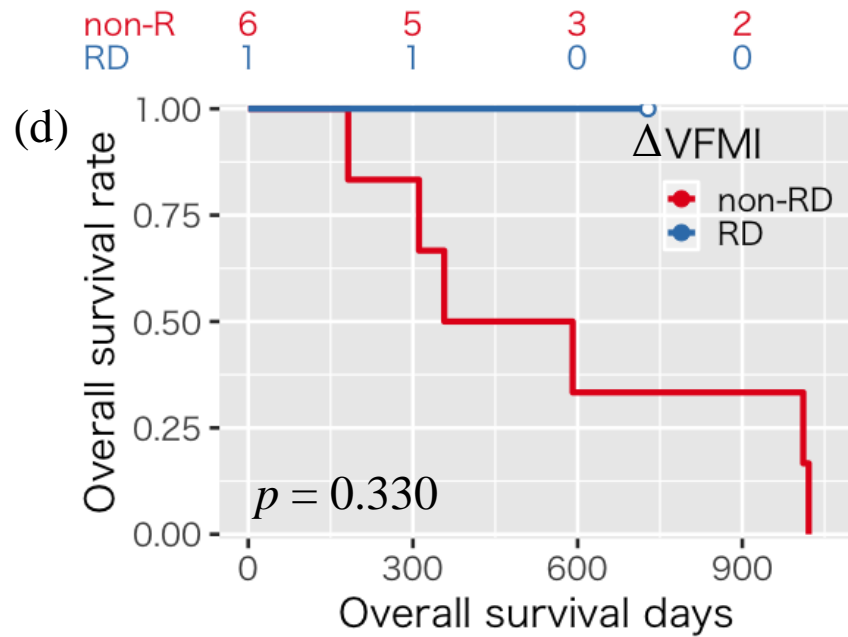

no 4  
yes 3

4 2

2 1

2 0

non-R 6  
RD 1

5 1

3 0

2 0

non-R 6  
RD 1

6 0

3 0

2 0

non-R 6  
RD 1

5 1

2 1

2 0

**Figure S3.** Intra-observer validations.

(a)

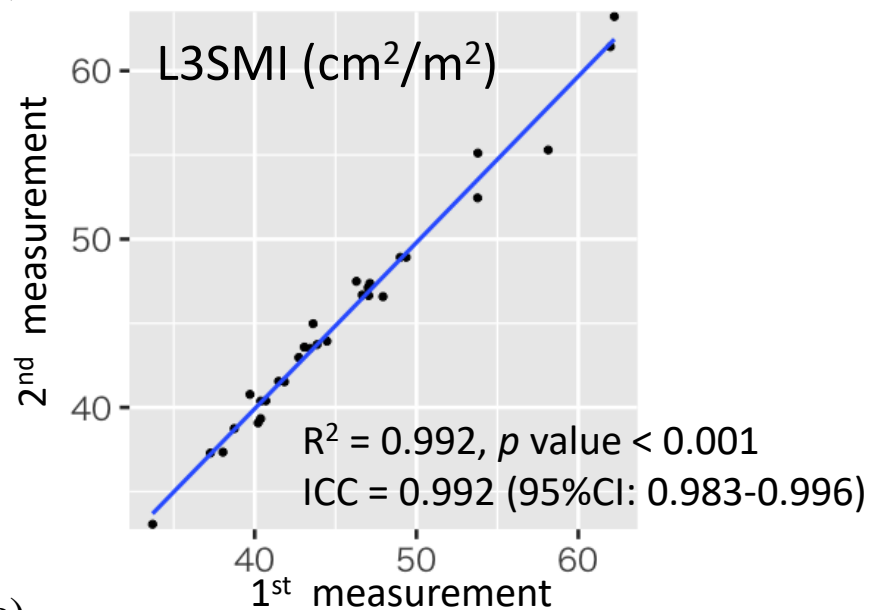

(b)

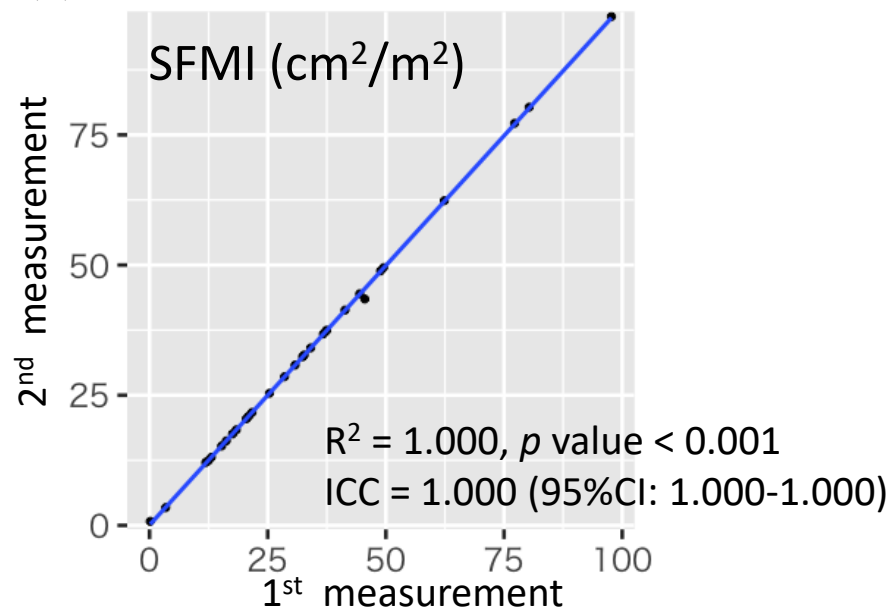

(c)

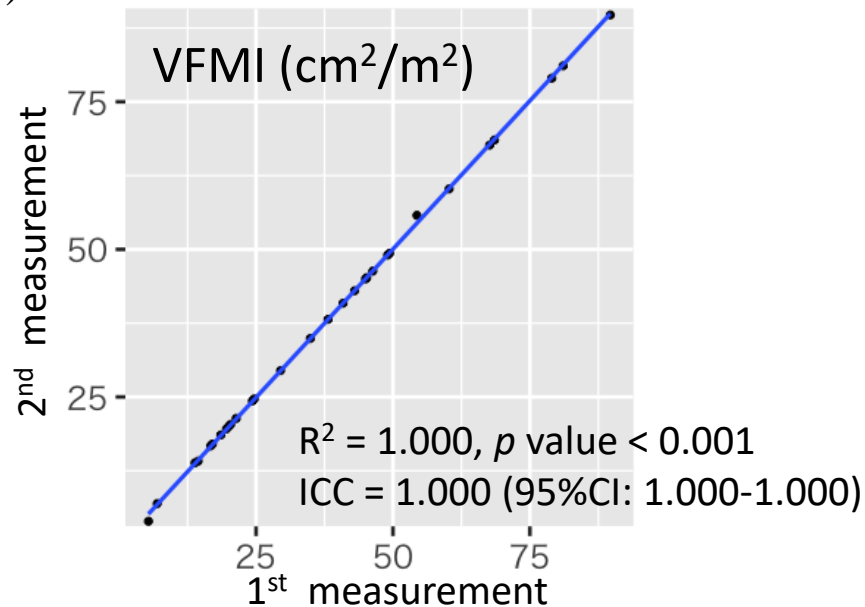

**Table S1.** The prevalence of patients with RD of  $\Delta$ L3SMI,  $\Delta$ SFMI, and  $\Delta$ VFMI between sarcopenia and non-sarcopenia groups.

| Variables                   | Non-Sarcopenia<br>(n=36) | Sarcopenia<br>(n=25) | <i>p</i> value |
|-----------------------------|--------------------------|----------------------|----------------|
| RD group in $\Delta$ L3SMI  | 7/36                     | 5/25                 | >0.999         |
| RD group in $\Delta$ SFMI   | 6/36                     | 6/25                 | 0.526          |
| RD group in $\Delta$ L3VFMI | 10/36                    | 2/25                 | 0.099          |
